# Supplementary material for: First report of charge-transfer induced heat-set hydrogel. Structural insights and remarkable properties
Source: Royal Society of Chemistry journal article supplement (doi:10.1039/c6nr01128d), 2016-01-01
Supplement: c6nr01128d1.pdf [file c6nr01128d1.pdf]

For the NDI-A crystal: The data have been assigned to the following deposition numbers.

CCDC 982241

For the 1:1 Pyrene:NDI-A co-crystal: The data have been assigned to the following deposition numbers.

CCDC 1023064

**These CCDC numbers have been also mentioned in the supporting information.**
